# Supplementary material
Source: bioRxiv or medRxiv preprint supplement (https://www.biorxiv.org/content/biorxiv/early/2021/05/08/2021.05.07.443164.1/DC3/embed/media-3.pdf)
Supplement: Supplementary file [file media-3.pdf]

**Table S3.** Pathways associated with significant DEGs between control chip cultures and COLIV-coated inserts.

|    | <b>Pathway description [# Genes]</b>                      | <b># of associated DEGs</b> | <b>ID</b>  | <b>p value</b>        | <b>q value</b>        |
|----|-----------------------------------------------------------|-----------------------------|------------|-----------------------|-----------------------|
| 1  | HALLMARK_TNFA_SIGNALING_VIA_NFKB [200]                    | 94                          | M5890      | 1.86 e <sup>-70</sup> | 1.03 e <sup>-66</sup> |
| 2  | GO_REGULATION_OF_INTRACELLULAR_SIGNAL_TRANSDUCTION [1864] | 279                         | GO:1902531 | 2 e <sup>-70</sup>    | 1.03 e <sup>-66</sup> |
| 3  | GO_REGULATION_OF_CELL_POPULATION_PROLIFERATION [1766]     | 270                         | GO:0042127 | 4.69 e <sup>-70</sup> | 1.61 e <sup>-66</sup> |
| 4  | GO_REGULATION_OF_PHOSPHORYLATION [1668]                   | 261                         | GO:0042325 | 9.27 e <sup>-70</sup> | 2.39 e <sup>-66</sup> |
| 5  | GO_REGULATION_OF_PHOSPHORUS_METABOLIC_PROCESSES [1868]    | 278                         | GO:0051174 | 1.32 e <sup>-69</sup> | 2.72 e <sup>-66</sup> |
| 6  | GO_APOPTOTIC_PROCESS [1994]                               | 284                         | GO:0006915 | 6.91 e <sup>-67</sup> | 1.19 e <sup>-63</sup> |
| 7  | GO_REGULATION_OF_PROTEIN_MODIFICATION_PROCESS [1915]      | 273                         | GO:0031399 | 2.94 e <sup>-64</sup> | 4.33 e <sup>-61</sup> |
| 8  | GO_REGULATION_OF_CELL_DIFFERENTIATION [1945]              | 267                         | GO:0045595 | 2.18 e <sup>-59</sup> | 2.81 e <sup>-56</sup> |
| 9  | GO_BIOLOGICAL_ADHESION [1481]                             | 227                         | GO:0022610 | 9.89 e <sup>-59</sup> | 1.13 e <sup>-55</sup> |
| 10 | GO_REGULATION_OF_CELL_DEATH [1746]                        | 249                         | GO:0010941 | 2.04 e <sup>-58</sup> | 2.1 e <sup>-55</sup>  |
